# Supplementary material for: UAVs Technology as a Complementary Tool in Post-Fire Vegetation Recovery Surveys in Mediterranean Fire-Prone Forests
Source: MDPI journal article supplement (doi:10.3390/f13071009), 2022-06-27
Supplement: s1 [file s1]

**Table S1.** Phytosociological relevés of the two investigate areas (ground surveys). All relevés are 100 sqm each and a western exposure; the geological substrate is indistinctly represented by quartzites and phyllites. The different background separates the two survey areas.

| st | Relevé number                                 | 6a  | 6b  | 6c  | 6f  | 6h  | 6l  | 6n  | 6p  | 6r  | 6u  | 4a  | 4c  | 4d  | 4e  | 4f  | 4g  | 4h  | 4i  | 4m  | 4n  |
|----|-----------------------------------------------|-----|-----|-----|-----|-----|-----|-----|-----|-----|-----|-----|-----|-----|-----|-----|-----|-----|-----|-----|-----|
|    | Elevation (m)                                 | 214 | 214 | 210 | 210 | 255 | 255 | 210 | 255 | 230 | 220 | 244 | 244 | 230 | 205 | 215 | 230 | 205 | 200 | 220 | 215 |
|    | Exposition                                    | W   | W   | W   | W   | W   | W   | W   | W   | W   | W   | W   | W   | W   | W   | W   | W   | W   | W   | W   | W   |
|    | Geological substrate                          | QF  |
|    | Area (m2)                                     | 100 | 100 | 100 | 100 | 100 | 100 | 100 | 100 | 100 | 100 | 100 | 100 | 100 | 100 | 100 | 100 | 100 | 100 | 100 | 100 |
|    | Cover (%)                                     | 86  | 74  | 93  | 96  | 71  | 70  | 87  | 70  | 95  | 96  | 29  | 19  | 19  | 20  | 23  | 23  | 35  | 13  | 24  | 31  |
|    | Slope (°)                                     | 25  | 25  | 25  | 40  | 40  | 40  | 40  | 30  | 35  | 40  | 45  | 45  | 45  | 45  | 45  | 45  | 45  | 45  | 45  | 45  |
|    | n° species                                    | 16  | 12  | 13  | 13  | 9   | 13  | 12  | 6   | 6   | 5   | 7   | 10  | 13  | 11  | 8   | 9   | 8   | 10  | 6   | 4   |
| 4  | <i>Quercus suber</i> L.                       | 3   | 3   | 3   | 1   | 1   | .   | 2   | 1   | 2   | 2   | .   | .   | .   | .   | .   | .   | .   | .   | .   | .   |
| 3  | <i>Quercus suber</i> L.                       | .   | +   | .   | .   | .   | .   | 1   | .   | .   | .   | +   | .   | +   | 1   | +   | +   | +   | .   | +   | .   |
|    | <i>Fraxinus ornus</i> L.                      | 1   | .   | r   | .   | .   | .   | +   | .   | .   | .   | .   | .   | .   | .   | .   | .   | .   | .   | .   | .   |
|    | <i>Arbutus unedo</i> L.                       | .   | .   | .   | +   | .   | .   | .   | +   | .   | +   | .   | .   | .   | +   | .   | .   | .   | .   | .   | .   |
| 2  | <i>Quercus suber</i> L.                       | r   | +   | .   | .   | .   | .   | .   | .   | +   | .   | .   | r   | .   | r   | .   | r   | .   | .   | .   | .   |
|    | <i>Fraxinus ornus</i> L.                      | +   | .   | .   | .   | .   | +   | .   | .   | .   | .   | .   | .   | .   | .   | .   | .   | .   | .   | .   | .   |
|    | <i>Phillyrea angustifolia</i> L.              | +   | 1   | +   | 1   | 1   | +   | 1   | +   | 1   | +   | 2   | 1   | r   | 1   | +   | 1   | +   | +   | .   | +   |
|    | <i>Arbutus unedo</i> L.                       | 2   | 2   | 2   | 1   | 2   | 1   | +   | 2   | 1   | 1   | .   | 1   | .   | 1   | .   | 1   | +   | 1   | +   | .   |
|    | <i>Smilax aspera</i> L.                       | 1   | 1   | .   | +   | 1   | +   | 1   | 2   | 1   | +   | .   | .   | +   | .   | .   | .   | .   | +   | +   | .   |
|    | <i>Pistacia lentiscus</i> L.                  | .   | .   | .   | .   | .   | .   | .   | .   | .   | .   | .   | .   | .   | .   | .   | +   | .   | .   | .   | .   |
|    | <i>Emerus major</i> Mill. subsp. <i>major</i> | +   | .   | .   | +   | .   | .   | .   | .   | .   | .   | .   | .   | .   | .   | .   | .   | .   | .   | .   | .   |
|    | <i>Rubia peregrina</i> L.                     | +   | 1   | +   | .   | .   | .   | +   | .   | .   | .   | .   | .   | .   | .   | .   | .   | .   | .   | .   | .   |
|    | <i>Tamus communis</i> L.                      | .   | .   | .   | .   | .   | .   | r   | .   | .   | .   | .   | .   | .   | .   | .   | .   | .   | .   | .   | .   |
|    | <i>Erica arborea</i> L.                       | +   | .   | 1   | +   | 1   | 2   | +   | 1   | .   | .   | 2   | 1   | 1   | 2   | 2   | 2   | 3   | +   | 1   | 3   |
|    | <i>Pinus pinaster</i> Aiton                   | .   | r   | .   | .   | r   | .   | .   | .   | .   | .   | .   | 1   | 1   | .   | +   | .   | +   | +   | .   | +   |
|    | <i>Myrtus communis</i> L.                     | +   | 1   | 1   | +   | +   | .   | .   | .   | .   | .   | 1   | 2   | 1   | 1   | .   | +   | .   | +   | .   | .   |
|    | <i>Cytisus villosus</i> Pour.                 | 3   | 2   | 1   | 1   | +   | +   | 2   | +   | 2   | 2   | .   | .   | .   | .   | .   | .   | .   | .   | .   | .   |
|    | <i>Cistus salvifolius</i> L.                  | .   | +   | .   | +   | .   | 1   | .   | .   | .   | .   | +   | .   | .   | 2   | +   | .   | .   | +   | .   | .   |
|    | <i>Lonicera implexa</i> Aiton                 | +   | +   | +   | +   | .   | +   | +   | .   | .   | .   | .   | .   | .   | r   | ..  | .   | .   | .   | .   | .   |
|    | <i>Dittrichia viscosa</i> (L.) Greuter        | .   | .   | .   | .   | .   | .   | .   | .   | ..  | .   | 1   | +   | +   | +   | +   | 1   | .   | +   | +   | +   |
| 1  | <i>Quercus suber</i> L.                       | .   | .   | +   | .   | .   | .   | .   | .   | .   | .   | .   | .   | .   | .   | .   | .   | .   | .   | .   | .   |
|    | <i>Phillyrea angustifolia</i> L.              | .   | .   | .   | +   | .   | .   | .   | .   | .   | .   | +   | +   | .   | +   | .   | .   | .   | .   | .   | .   |
|    | <i>Arbutus unedo</i> L.                       | +   | .   | .   | .   | +   | .   | .   | .   | .   | .   | .   | +   | .   | .   | .   | .   | .   | .   | +   | .   |
|    | <i>Smilax aspera</i> L.                       | 3   | 2   | +   | 1   | .   | .   | +   | .   | .   | +   | .   | 1   | 1   | 1   | +   | .   | .   | .   | .   | .   |
|    | <i>Pistacia lentiscus</i> L.                  | .   | .   | .   | .   | .   | .   | .   | .   | .   | .   | .   | .   | .   | r   | .   | .   | .   | .   | .   | .   |
|    | <i>Emerus major</i> Mill. subsp. <i>major</i> | +   | +   | .   | +   | .   | +   | .   | .   | .   | .   | .   | .   | .   | .   | .   | .   | .   | .   | .   | .   |
|    | <i>Rubia peregrina</i> L.                     | 2   | 2   | 1   | +   | .   | 1   | +   | .   | .   | .   | .   | +   | .   | .   | .   | +   | .   | .   | .   | .   |
|    | <i>Tamus communis</i> L.                      | .   | .   | .   | .   | .   | r   | .   | .   | .   | .   | .   | .   | .   | .   | .   | .   | .   | .   | .   | .   |
|    | <i>Erica arborea</i> L.                       | +   | .   | .   | .   | +   | .   | .   | .   | .   | .   | .   | .   | +   | +   | .   | +   | .   | .   | +   | .   |
|    | <i>Pinus pinaster</i> Aiton                   | r   | ..  | .   | r   | .   | .   | .   | .   | .   | .   | .   | +   | .   | .   | +   | .   | .   | +   | .   | .   |
|    | <i>Myrtus communis</i> L.                     | .   | +   | 2   | .   | 1   | +   | .   | .   | .   | .   | .   | .   | .   | +   | .   | .   | .   | .   | .   | .   |
|    | <i>Cytisus villosus</i> Pour.                 | +   | .   | +   | .   | .   | +   | 1   | .   | .   | .   | .   | .   | .   | .   | .   | .   | .   | .   | .   | .   |
|    | <i>Genista pilosa</i> L.                      | .   | .   | +   | .   | .   | .   | .   | .   | .   | .   | .   | +   | +   | .   | +   | .   | +   | .   | +   | .   |
|    | <i>Ulex europaeus</i> L.                      | .   | .   | .   | .   | .   | .   | .   | .   | .   | .   | .   | .   | .   | .   | .   | +   | .   | .   | .   | .   |
|    | <i>Cistus salvifolius</i> L.                  | 1   | 2   | +   | 1   | .   | +   | +   | .   | .   | .   | 2   | .   | 1   | 1   | .   | .   | .   | .   | .   | .   |
|    | <i>Lonicera implexa</i> Aiton                 | +   | +   | +   | +   | .   | +   | +   | .   | .   | .   | .   | .   | .   | .   | .   | .   | .   | .   | .   | .   |
|    | <i>Lavandula stoechas</i> L.                  | .   | .   | .   | .   | .   | .   | .   | .   | .   | .   | .   | .   | +   | .   | .   | .   | .   | .   | .   | .   |
|    | <i>Brachypodium sylvaticum</i> (Hud.) Beauv.  | 1   | .   | .   | .   | +   | +   | .   | .   | .   | .   | .   | .   | +   | .   | .   | .   | .   | .   | .   | .   |

|                                             |   |   |   |   |   |   |   |   |   |   |   |   |   |   |   |   |   |   |   |   |
|---------------------------------------------|---|---|---|---|---|---|---|---|---|---|---|---|---|---|---|---|---|---|---|---|
| <i>Helichrysum italicum</i><br>(Roth) G.Don | r | . | . | . | . | . | . | . | . | . | . | . | . | . | . | . | . | . | . | . |
| <i>Erigeron bonariensis</i><br>L.           | . | . | . | + | . | . | . | . | . | . | . | . | . | . | + | . | + | + | . | . |
| <i>Dittrichia viscosa</i> (L.)<br>Greuter   | . | . | . | . | . | . | . | . | . | . | . | . | . | . | + | . | + | + | . | + |
| <i>Asparagus acutifolius</i><br>L.          | + | 1 | . | + | . | . | + | . | + | . | . | . | . | . | + | . | . | . | . | . |
| <i>Daphne gnidium</i> L.                    | . | . | r | . | . | . | . | . | . | . | . | . | . | . | r | . | . | . | . | . |
